# Supplementary material
Source: Research Square preprint supplement (doi:10.21203/rs.3.rs-8967864/v1)
Supplement: Supplementary file 1 [file 7521ad6ac54f98891d5a7927.docx]

**Online resource 2.** Postoperative outcomes in the propensity score-matched cohort

| Variable | Robotic | Laparoscopic | p |
| --- | --- | --- | --- |
| n | 31 | 59 |  |
| Operative time, min (median [IQR]) | 276.0 (233.0 - 345.5) | 249.0 (186.0 – 339.5) | 0.413 |
| Estimated blood loss, ml (median [IQR]) | 20.0 (10.0 - 69.0) | 28.0 (15.0 - 117.5) | 0.147 |
| Complications (≥ CD Ⅱ) (%) | 8 (25.8) | 12 (20.3) | 0.744 |
| R0 resection (%) | 27 (87.1) | 49 (83.1) | 0.844 |

Note: Data are presented as median [IQR] or number (%).
