# Supplementary material
Source: Research Square preprint supplement (doi:10.21203/rs.3.rs-8967864/v1)
Supplement: Supplementary file 2 [file e3bb8f29317435bc9c4ac2ea.docx]

**Online Resource 1. Baseline characteristics of the propensity score-matched cohort**

| Variable | Robotic | Laparoscopic | p | SMD |
| --- | --- | --- | --- | --- |
| n | 31 | 59 |  |  |
| Age, years (median [IQR]) | 72.0 (66.0-76.5) | 72.0 (66.0-80.5) | 0.959 | 0.001 |
| Sex(male) (%) | 20 (64.5) | 32 (54.2) | 0.475 | 0.210 |
| BMI (median [IQR]) | 21.6 (19.8-23.9) | 21.3 (18.6-2.7) | 0.581 | 0.130 |
| ASA-PS ≥3 (%) | 2(6.5) | 7 (11.9) | 0.657 | 0.188 |
| Location of tumor (%) |  |  | 0.956 | 0.066 |
| Left | 5 (16.1) | 9 (15.3) |  |  |
| R | 19 (61.3) | 38 (64.4) |  |  |
| Right | 7 (22.6) | 12 (20.3) |  |  |
| Clinical T 4 (%) | 15 (48.4) | 33 (55.9) | 0.646 | 0.151 |
| Clinical N positive (%) | 18 (58.1) | 31 (52.5) | 0.782 | 0.111 |
| Multivisceral resection (%) | 7 (22.6) | 14 (23.7) | 1.000 | 0.027 |
| Pathological T 4b (%) | 10 (32.3) | 17 (28.8) | 0.923 | 0.075 |
| Preoperative treatment (%) | 4 (12.9) | 10 (16.9) | 0.844 | 0.114 |

Note: SMD = Standardized Mean Difference. SMD < 0.1 indicates negligible imbalance.
